# Supplementary material
Source: PubMed Central journal article supplement (PMC5394313)
Supplement: AEM.00211-17_zam999117809s1.pdf [file AEM.00211-17_zam999117809s1.pdf]

1 **Figure S1.** Plot of the interaction between habitat type, raccoon body weight (kg), hemoplasma infection. [*Footnote for Figure S1: This*  
2 *plot shows the relationship (slope) between weight, habitat type, and predicted hemoplasma positivity based on a generalized linear*  
3 *model. The weight-hemoplasma positivity relationship for the rural habitat is represented by the black line, and the model predicted*  
4 *relationship from the urban habitat is shown by the red line. The slope of the weight-hemoplasma positivity relationship is higher for the*  
5 *rural habitat than for the urban one.*]

6 **Figure S2.** Frequency of hemoplasma genotype richness in raccoons in protected and urban barrier island habitats.

7 **Figure S3.** Alignment of the 16S rRNA gene sequences of raccoon hemoplasma genotype 3 and other related hemoplasma  
8 sequences that demonstrates nucleotide sequence differences between the species. The primer regions used for the species-specific  
9 PCR of this novel genotype are highlighted.

10 **Figure S4.** Alignment of the 16S rRNA gene sequences of raccoon hemoplasma genotype 6 and other related hemoplasma  
11 sequences that demonstrates nucleotide sequence differences between the species. The primer regions used for the species-specific  
12 PCR of this novel genotype are highlighted.

13 **Figure S5.** Alignment of the 16S rRNA gene sequences of raccoon hemoplasma genotype 4 and other related hemoplasma  
14 sequences that demonstrates nucleotide sequence differences between the species. The primer regions used for the species-specific  
15 PCR of this novel genotype are highlighted.

16 **Figure S6.** Alignment of the 16S rRNA gene sequences of raccoon hemoplasma genotype 5 and other related hemoplasma  
17 sequences that demonstrates nucleotide sequence differences between the species. The primer regions used for the species-specific  
18 PCR of this novel genotype are highlighted.

19 **Figure S7.** Alignment of the 16S rRNA gene sequences of raccoon hemoplasma genotype 2 and other related hemoplasma  
20 sequences that demonstrates nucleotide sequence differences between the species. The primer regions used for the species-specific  
21 PCR of this novel genotype are highlighted.

22 **Table S1.** Oligonucleotide primers used in the study.

23 **Table S2.** Interspecies similarity of the 16S rRNA gene among the hemoplasma genotypes detected in raccoons to all other known  
24 hemotropic *Mycoplasma* species.

25 Table S3. Best fit GLM of hemoplasma infection prevalence in raccoons.

26

Figure S1

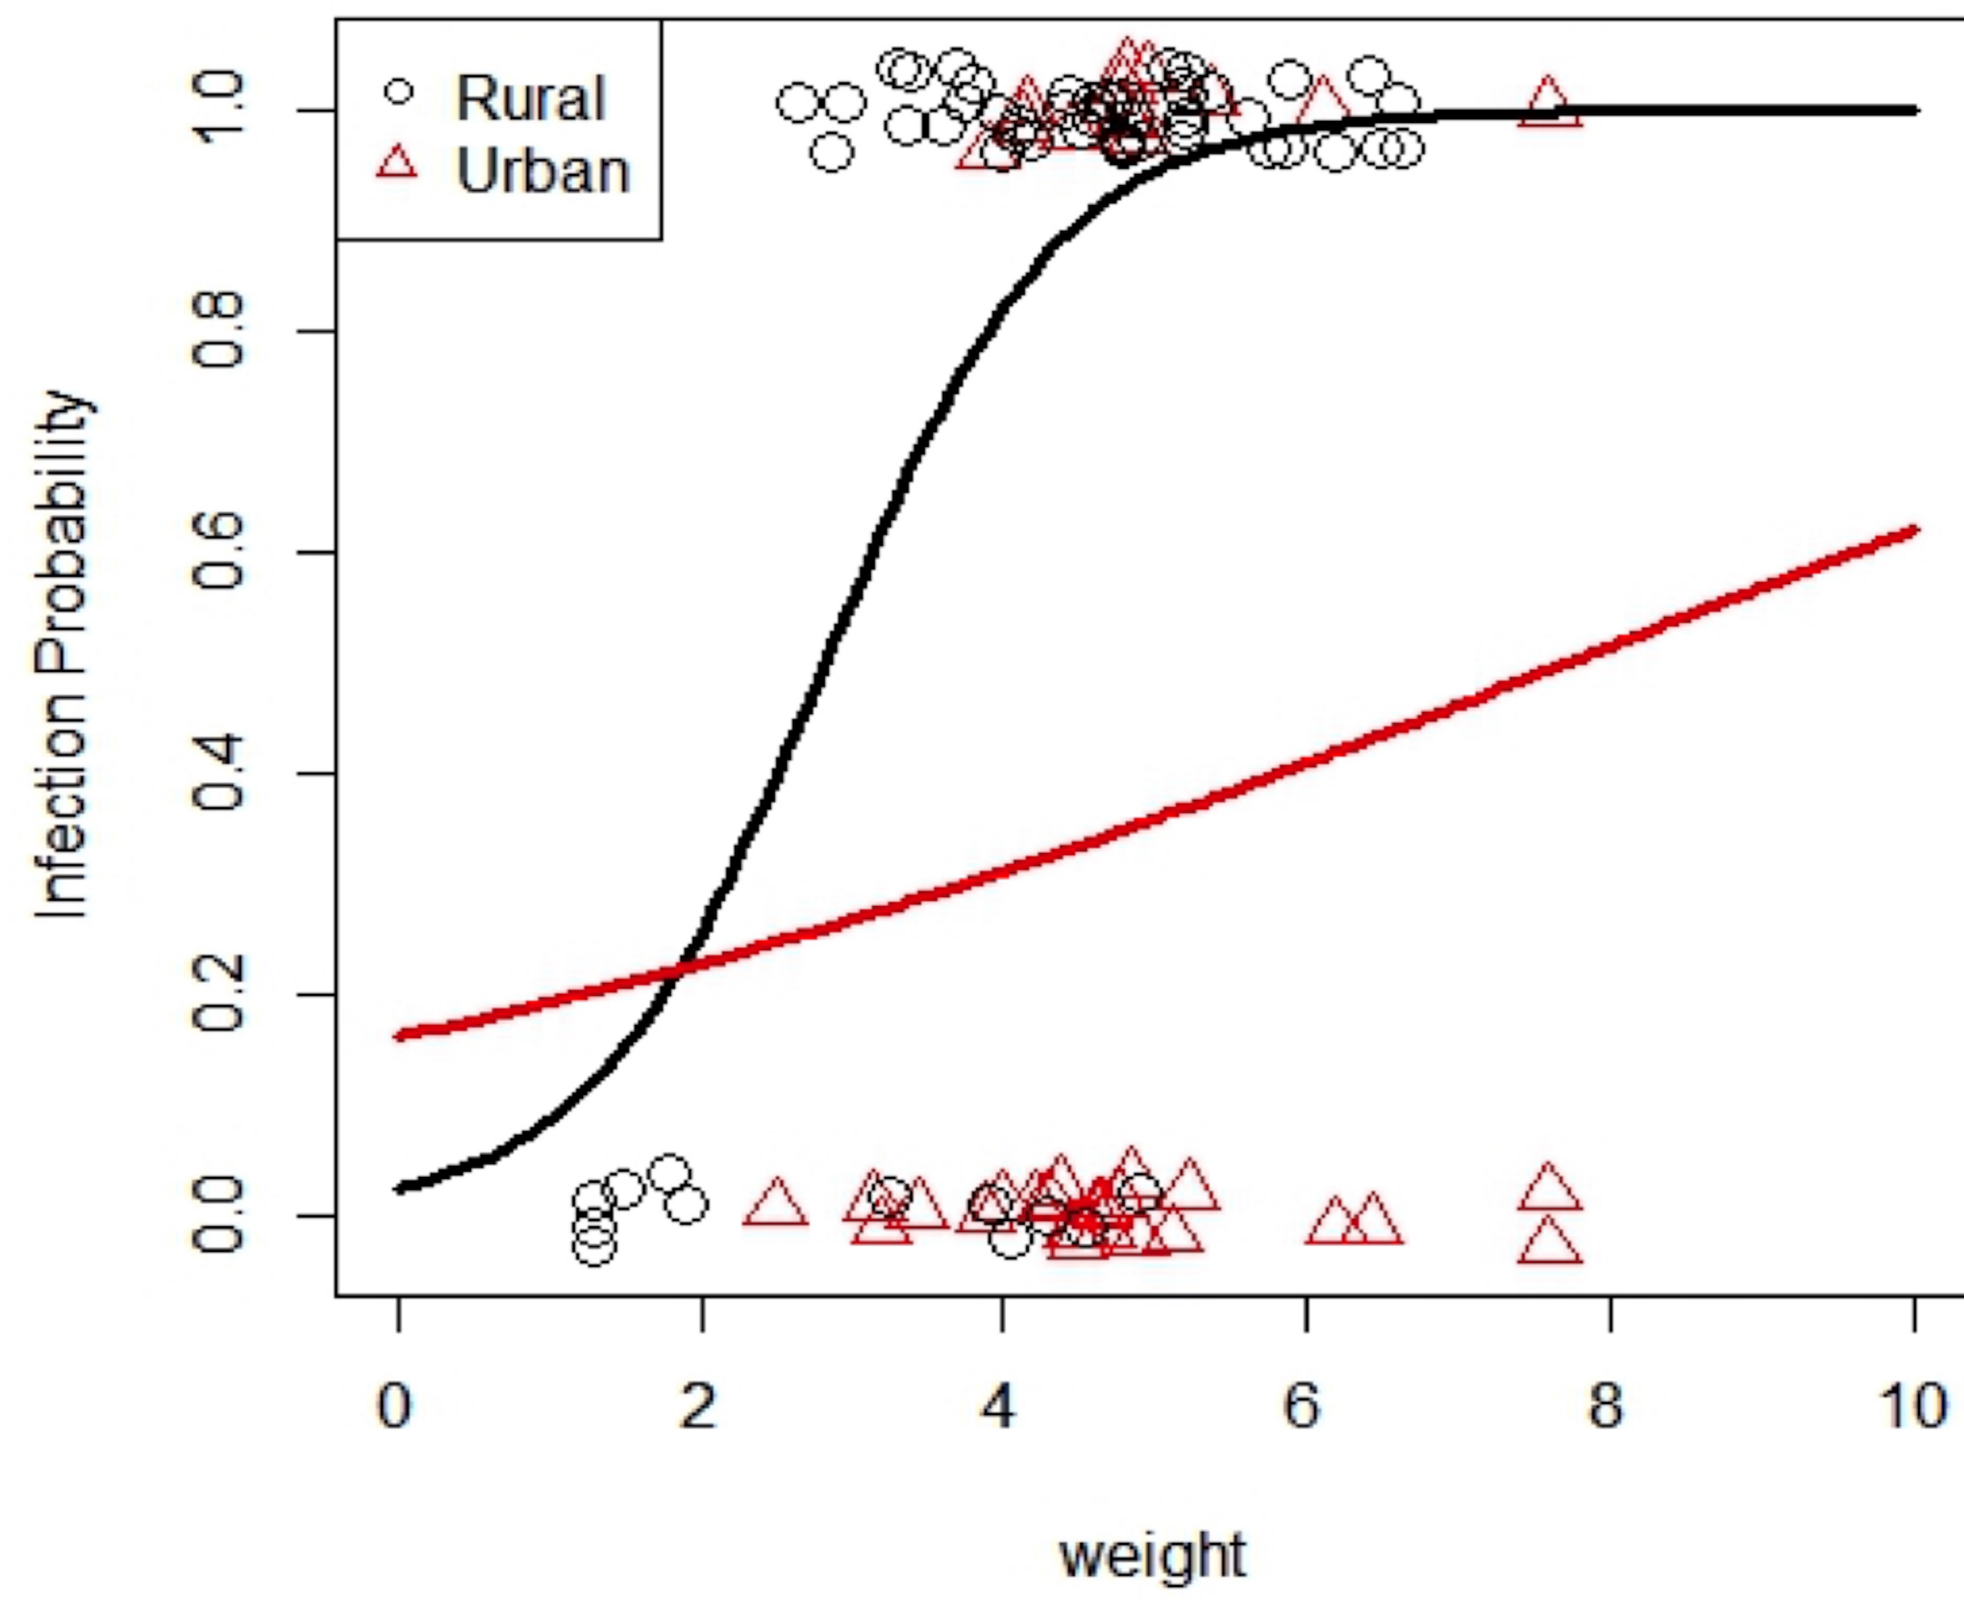

Figure S2

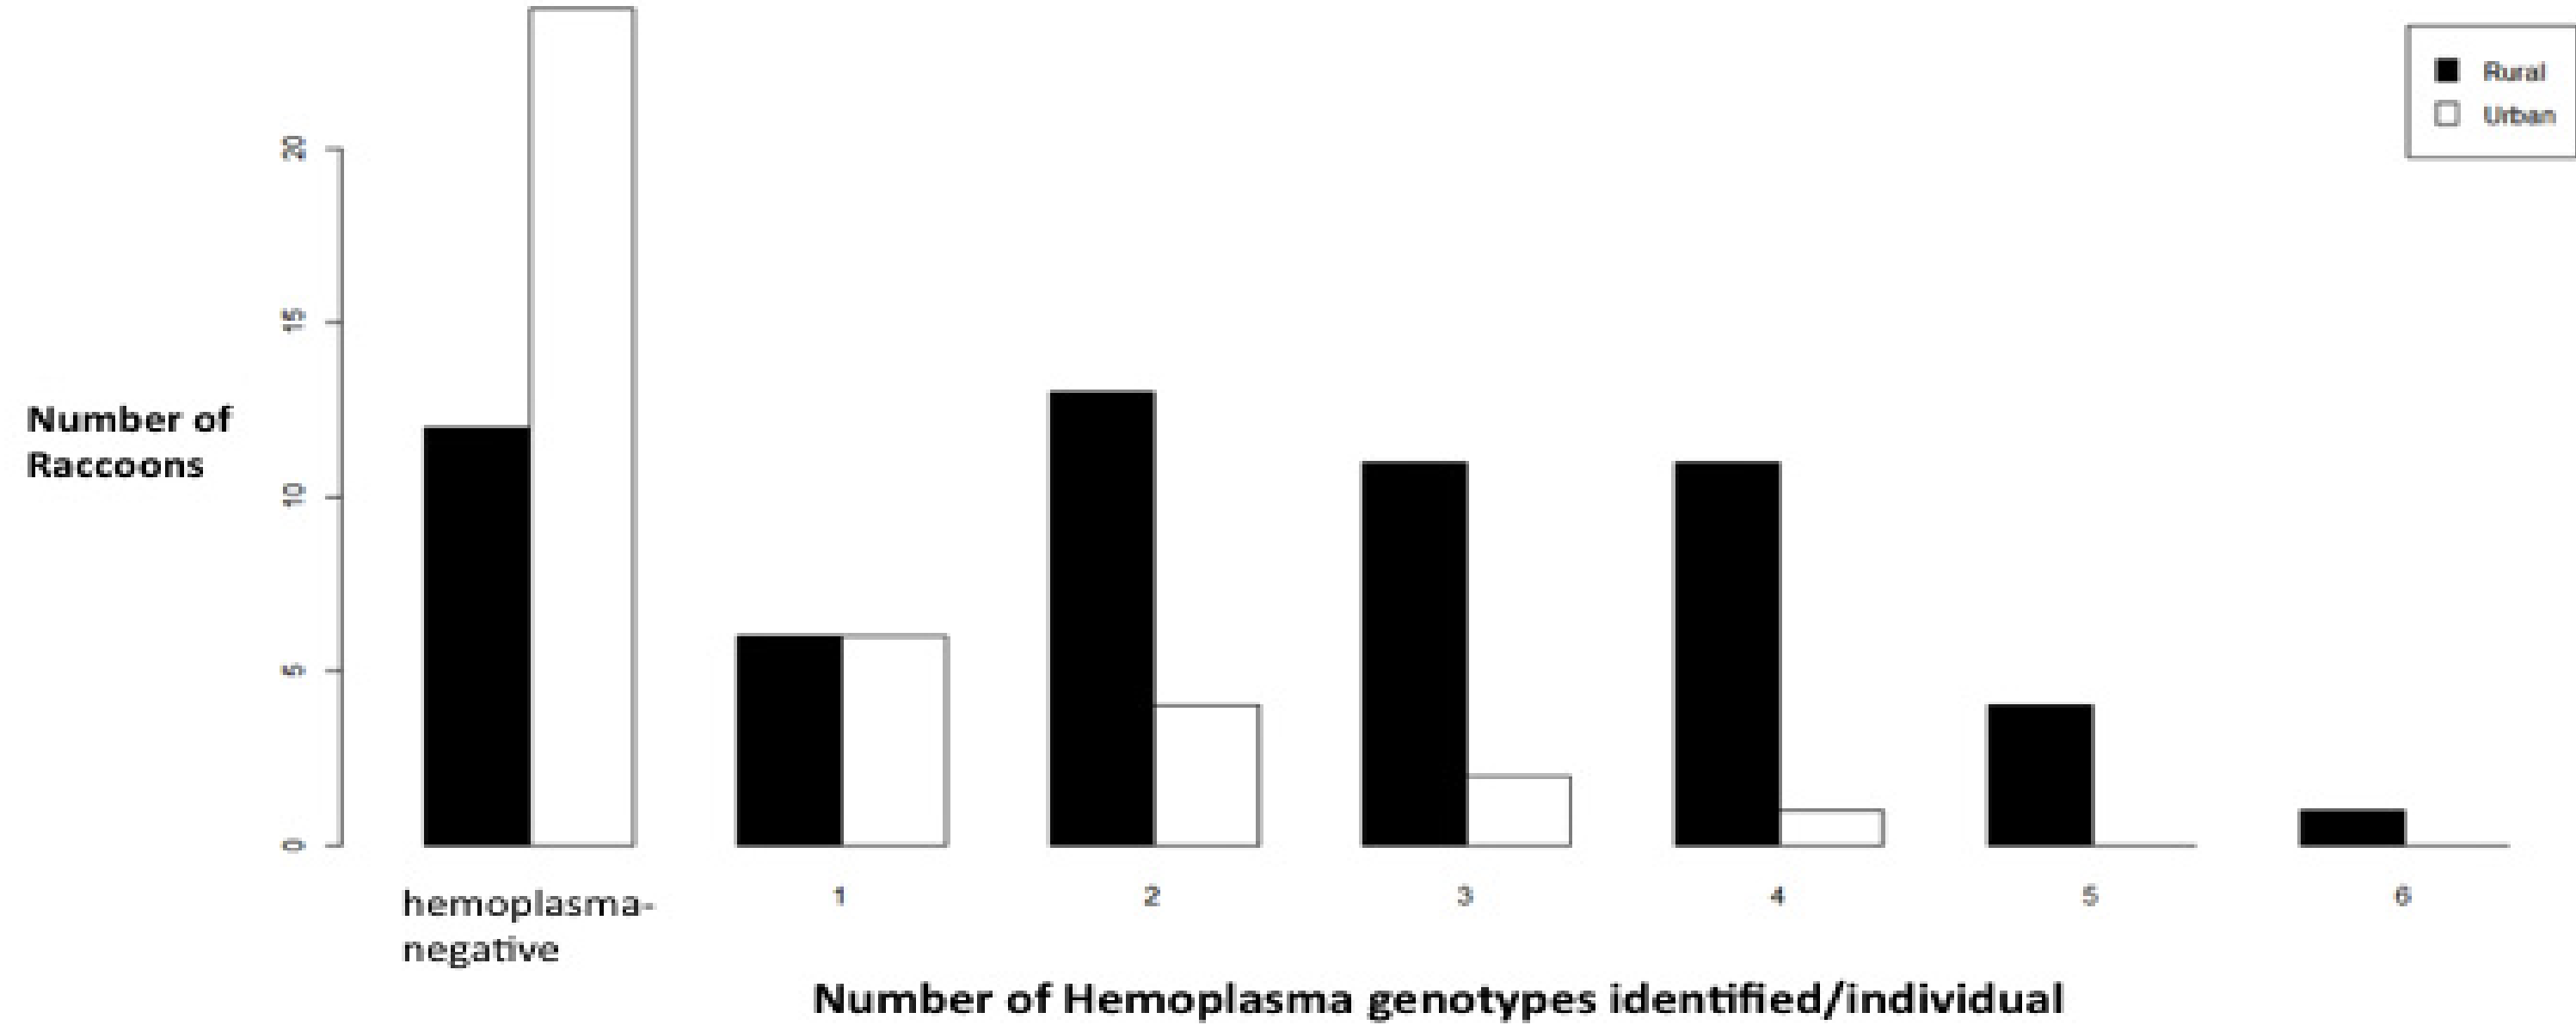

# FIG S3: 16S Raccoon Hemoplasma Genotype 3

|            |                                                                                                                                                                   |                                                       |     |
|------------|-------------------------------------------------------------------------------------------------------------------------------------------------------------------|-------------------------------------------------------|-----|
| KC920443_P | CTGTGGTATGCAACACATCAAGTTCGAAAGTAACTTTAGCAATTAAGA---TAGTGGCAACGGGGGCAACACATATCTAACTAATCTGTGTGGAGGATAGCAACCCGAAAGGTTATTAATCTTCATAGTTTATG-GA-ATAAATAA--GGAGGCTCC-180 | GCCTTGCAGCAACACGGGATATGCTCTATTAGTAGTTCGGCGGGTAAAGCCCA | 231 |
| KC920444_P | .....                                                                                                                                                             | .....                                                 | 231 |
| KC920446_P | .....                                                                                                                                                             | .....                                                 | 231 |
| KC920445_P | .....                                                                                                                                                             | .....                                                 | 231 |
| KC920444_P | .....                                                                                                                                                             | .....                                                 | 231 |
| KC920442_P | .....                                                                                                                                                             | .....                                                 | 231 |
| KC920448_P | .....                                                                                                                                                             | .....                                                 | 231 |
| KC920440_P | .....                                                                                                                                                             | .....                                                 | 231 |
| KC920439_P | .....                                                                                                                                                             | .....                                                 | 231 |
| AF178676_M | .....                                                                                                                                                             | .....                                                 | 231 |
| AF338269_M | .....                                                                                                                                                             | .....                                                 | 231 |
| KF743729_P | .....                                                                                                                                                             | .....                                                 | 231 |
| KF743724_P | .....                                                                                                                                                             | .....                                                 | 231 |
| KF743727_P | .....                                                                                                                                                             | .....                                                 | 231 |
| KF743722_P | .....                                                                                                                                                             | .....                                                 | 231 |
| KF743713_P | .....                                                                                                                                                             | .....                                                 | 231 |
| KC936280_P | .....                                                                                                                                                             | .....                                                 | 231 |
| KF743717_P | .....                                                                                                                                                             | .....                                                 | 231 |
| AB848113_M | .....                                                                                                                                                             | .....                                                 | 231 |
| GU905012_M | .....                                                                                                                                                             | .....                                                 | 231 |
| AF306346_M | .....                                                                                                                                                             | .....                                                 | 231 |
| UB8564_M   | .....                                                                                                                                                             | .....                                                 | 231 |
| KF743739_M | .....                                                                                                                                                             | .....                                                 | 231 |
| KF743738_M | .....                                                                                                                                                             | .....                                                 | 231 |
| KF743737_M | .....                                                                                                                                                             | .....                                                 | 231 |
| AY383241_M | .....                                                                                                                                                             | .....                                                 | 231 |
| AY946266_M | .....                                                                                                                                                             | .....                                                 | 231 |
| UB8564_M   | .....                                                                                                                                                             | .....                                                 | 231 |
| AF338268_M | .....                                                                                                                                                             | .....                                                 | 231 |
| EU165512_M | .....                                                                                                                                                             | .....                                                 | 231 |
| AB558999_M | .....                                                                                                                                                             | .....                                                 | 231 |
| AB558897_M | .....                                                                                                                                                             | .....                                                 | 231 |
| AY492086_M | .....                                                                                                                                                             | .....                                                 | 231 |
| KF743726_P | .....                                                                                                                                                             | .....                                                 | 231 |
| KF743711_P | .....                                                                                                                                                             | .....                                                 | 231 |
| KF743728_P | .....                                                                                                                                                             | .....                                                 | 231 |
| KF743721_P | .....                                                                                                                                                             | .....                                                 | 231 |
| KF743719_P | .....                                                                                                                                                             | .....                                                 | 231 |
| KF743718_P | .....                                                                                                                                                             | .....                                                 | 231 |
| KF743716_P | .....                                                                                                                                                             | .....                                                 | 231 |
| HU562823_M | .....                                                                                                                                                             | .....                                                 | 231 |
| HM082963_M | .....                                                                                                                                                             | .....                                                 | 231 |
| DQ171531_M | .....                                                                                                                                                             | .....                                                 | 231 |
| AY831867_M | .....                                                                                                                                                             | .....                                                 | 231 |
| AY171918_M | .....                                                                                                                                                             | .....                                                 | 231 |
| FB166774_M | .....                                                                                                                                                             | .....                                                 | 231 |
| AB882028_M | .....                                                                                                                                                             | .....                                                 | 231 |
| AB848714_M | .....                                                                                                                                                             | .....                                                 | 231 |
| AF548631_M | .....                                                                                                                                                             | .....                                                 | 231 |
| AF548631_M | .....                                                                                                                                                             | .....                                                 | 231 |
| AF743714_P | .....                                                                                                                                                             | .....                                                 | 231 |
| AF743715_P | .....                                                                                                                                                             | .....                                                 | 231 |
| KF743709_P | .....                                                                                                                                                             | .....                                                 | 231 |
| KF743723_P | .....                                                                                                                                                             | .....                                                 | 231 |
| KF743722_P | .....                                                                                                                                                             | .....                                                 | 231 |
| KF743705_P | .....                                                                                                                                                             | .....                                                 | 231 |
| KF743712_P | .....                                                                                                                                                             | .....                                                 | 231 |
| KF743725_P | .....                                                                                                                                                             | .....                                                 | 231 |
| KF743708_P | .....                                                                                                                                                             | .....                                                 | 231 |
| KF743730_P | .....                                                                                                                                                             | .....                                                 | 231 |
| GU743681_M | .....                                                                                                                                                             | .....                                                 | 231 |
| KF743706_P | .....                                                                                                                                                             | .....                                                 | 231 |
| KF743734_P | .....                                                                                                                                                             | .....                                                 | 231 |
| KF743715_P | .....                                                                                                                                                             | .....                                                 | 231 |
| KF743736_P | .....                                                                                                                                                             | .....                                                 | 231 |
| KF743704_P | .....                                                                                                                                                             | .....                                                 | 231 |
| KF743716_P | .....                                                                                                                                                             | .....                                                 | 231 |
| KF743710_P | .....                                                                                                                                                             | .....                                                 | 231 |
| KF743733_P | .....                                                                                                                                                             | .....                                                 | 231 |
| KF743707_P | .....                                                                                                                                                             | .....                                                 | 231 |
| KF743731_P | .....                                                                                                                                                             | .....                                                 | 231 |
| KF743720_P | .....                                                                                                                                                             | .....                                                 | 231 |
| FJ226566_M | .....                                                                                                                                                             | .....                                                 | 231 |
| AF152879_M | .....                                                                                                                                                             | .....                                                 | 231 |
| KF743735_P | .....                                                                                                                                                             | .....                                                 | 231 |
| DQ522159_M | .....                                                                                                                                                             | .....                                                 | 231 |

|            |                                                                                                                                                                                                                                             |       |     |
|------------|---------------------------------------------------------------------------------------------------------------------------------------------------------------------------------------------------------------------------------------------|-------|-----|
| KC920443_P | GCCTCTGATGGGTAGCTGGACTGAGAGTGGTACCAGCCGCAAGGGATGAGATATGGCCATATCTCTACGGGAAGCAGCAGTGGAGGATTTTTCACATGGCAAGAACTCTGATGGAGCAATACCAGTGAACGATGAAGGCTCTCT-GATTGTAAGTCTTTTACTTAGCAAAAAG-CITGACAGGAATGGTAAAGCCCTGCTGCTAAGTGAATAGTACACCTAACTATGTCGACAGC | ..... | 480 |
| KC920444_P | .....                                                                                                                                                                                                                                       | ..... | 480 |
| KC920446_P | .....                                                                                                                                                                                                                                       | ..... | 480 |
| KC920445_P | .....                                                                                                                                                                                                                                       | ..... | 480 |
| KC920444_P | .....                                                                                                                                                                                                                                       | ..... | 480 |
| KC920442_P | .....                                                                                                                                                                                                                                       | ..... | 480 |
| KC920448_P | .....                                                                                                                                                                                                                                       | ..... | 480 |
| KC920440_P | .....                                                                                                                                                                                                                                       | ..... | 480 |
| KC920439_P | .....                                                                                                                                                                                                                                       | ..... | 480 |
| AF178676_M | .....                                                                                                                                                                                                                                       | ..... | 480 |
| AF338269_M | .....                                                                                                                                                                                                                                       | ..... | 480 |
| KF743729_P | .....                                                                                                                                                                                                                                       | ..... | 480 |
| KF743724_P | .....                                                                                                                                                                                                                                       | ..... | 480 |
| KF743727_P | .....                                                                                                                                                                                                                                       | ..... | 480 |
| KF743722_P | .....                                                                                                                                                                                                                                       | ..... | 480 |
| KF743713_P | .....                                                                                                                                                                                                                                       | ..... | 480 |
| KC936280_P | .....                                                                                                                                                                                                                                       | ..... | 480 |
| KF743717_P | .....                                                                                                                                                                                                                                       | ..... | 480 |
| AB848113_M | .....                                                                                                                                                                                                                                       | ..... | 480 |
| GU905012_M | .....                                                                                                                                                                                                                                       | ..... | 480 |
| AF306346_M | .....                                                                                                                                                                                                                                       | ..... | 480 |
| UB8564_M   | .....                                                                                                                                                                                                                                       | ..... | 480 |
| KF743739_M | .....                                                                                                                                                                                                                                       | ..... | 480 |
| KF743738_M | .....                                                                                                                                                                                                                                       | ..... | 480 |
| KF743737_M | .....                                                                                                                                                                                                                                       | ..... | 480 |
| AY383241_M | .....                                                                                                                                                                                                                                       | ..... | 480 |
| AY946266_M | .....                                                                                                                                                                                                                                       | ..... | 480 |
| UB8564_M   | .....                                                                                                                                                                                                                                       | ..... | 480 |
| AF338268_M | .....                                                                                                                                                                                                                                       | ..... | 480 |
| EU165512_M | .....                                                                                                                                                                                                                                       | ..... | 480 |
| AB558999_M | .....                                                                                                                                                                                                                                       | ..... | 480 |
| AB558897_M | .....                                                                                                                                                                                                                                       | ..... | 480 |
| AY492086_M | .....                                                                                                                                                                                                                                       | ..... | 480 |
| KF743726_P | .....                                                                                                                                                                                                                                       | ..... | 480 |
| KF743711_P | .....                                                                                                                                                                                                                                       | ..... | 480 |
| KF743728_P | .....                                                                                                                                                                                                                                       | ..... | 480 |
| KF743721_P | .....                                                                                                                                                                                                                                       | ..... | 480 |
| KF743719_P | .....                                                                                                                                                                                                                                       | ..... | 480 |
| KF743718_P | .....                                                                                                                                                                                                                                       | ..... | 480 |
| KF743716_P | .....                                                                                                                                                                                                                                       | ..... | 480 |
| HU562823_M | .....                                                                                                                                                                                                                                       | ..... | 480 |
| HM082963_M | .....                                                                                                                                                                                                                                       | ..... | 480 |
| DQ171531_M | .....                                                                                                                                                                                                                                       | ..... | 480 |
| AY831867_M | .....                                                                                                                                                                                                                                       | ..... | 480 |
| AY171918_M | .....                                                                                                                                                                                                                                       | ..... | 480 |
| FB166774_M | .....                                                                                                                                                                                                                                       | ..... | 480 |
| AB882028_M | .....                                                                                                                                                                                                                                       | ..... | 480 |
| AB848714_M | .....                                                                                                                                                                                                                                       | ..... | 480 |
| AF548631_M | .....                                                                                                                                                                                                                                       | ..... | 480 |
| AF548631_M | .....                                                                                                                                                                                                                                       | ..... | 480 |
| AF743714_P | .....                                                                                                                                                                                                                                       | ..... | 480 |
| AF743715_P | .....                                                                                                                                                                                                                                       | ..... | 480 |
| KF743709_P | .....                                                                                                                                                                                                                                       | ..... | 480 |
| KF743723_P | .....                                                                                                                                                                                                                                       | ..... | 480 |
| KF743722_P | .....                                                                                                                                                                                                                                       | ..... | 480 |
| KF743705_P | .....                                                                                                                                                                                                                                       | ..... | 480 |
| KF743712_P | .....                                                                                                                                                                                                                                       | ..... | 480 |
| KF743725_P | .....                                                                                                                                                                                                                                       | ..... | 480 |
| KF743708_P | .....                                                                                                                                                                                                                                       | ..... | 480 |
| KF743730_P | .....                                                                                                                                                                                                                                       | ..... | 480 |
| GU743681_M | .....                                                                                                                                                                                                                                       | ..... | 480 |
| KF743706_P | .....                                                                                                                                                                                                                                       | ..... | 480 |
| KF743734_P | .....                                                                                                                                                                                                                                       | ..... | 480 |
| KF743715_P | .....                                                                                                                                                                                                                                       | ..... | 480 |
| KF743736_P | .....                                                                                                                                                                                                                                       | ..... | 480 |
| KF743704_P | .....                                                                                                                                                                                                                                       | ..... | 480 |
| KF743716_P | .....                                                                                                                                                                                                                                       | ..... | 480 |
| KF743710_P | .....                                                                                                                                                                                                                                       | ..... | 480 |
| KF743733_P | .....                                                                                                                                                                                                                                       | ..... | 480 |
| KF743707_P | .....                                                                                                                                                                                                                                       | ..... | 480 |
| KF743731_P | .....                                                                                                                                                                                                                                       | ..... | 480 |
| KF743720_P | .....                                                                                                                                                                                                                                       | ..... | 480 |
| FJ226566_M | .....                                                                                                                                                                                                                                       | ..... | 480 |
| AF152879_M | .....                                                                                                                                                                                                                                       | ..... | 480 |
| KF743735_P | .....                                                                                                                                                                                                                                       | ..... | 480 |
| DQ522159_M | .....                                                                                                                                                                                                                                       | ..... | 480 |

Genomic coordinates and sequence alignments for various samples (e.g., KF743712, KF743725, etc.) across a range of positions (50-950). The sequences are aligned to a reference sequence, with gaps indicated by dashes.

Genomic coordinates and sequence alignments for various samples (e.g., KC920443, KC920441, etc.) across a range of positions (520-950). The sequences are aligned to a reference sequence, with gaps indicated by dashes.

Genomic coordinates and sequence alignments for various samples (e.g., KC920443, KC920441, etc.) across a range of positions (760-1000). The sequences are aligned to a reference sequence, with gaps indicated by dashes.



|           |   |     |      |      |    |    |   |    |    |    |    |      |    |    |   |      |      |      |      |      |      |      |
|-----------|---|-----|------|------|----|----|---|----|----|----|----|------|----|----|---|------|------|------|------|------|------|------|
| KF743713  | P | C   | A    | AT   | A  | G  | C | GT | T  | A  | C  | 1415 |    |    |   |      |      |      |      |      |      |      |
| KC936280  | P | C   | A    | AT   | A  | G  | C | GT | T  | A  | C  | 1415 |    |    |   |      |      |      |      |      |      |      |
| KF743717  | P | C   | A    | AT   | A  | G  | C | GT | T  | A  | C  | 1415 |    |    |   |      |      |      |      |      |      |      |
| AB848713  | M | T   | A    | AT   | A  | G  | C | GT | T  | A  | C  | 1393 |    |    |   |      |      |      |      |      |      |      |
| GU905012  | M | T   | A    | AT   | A  | G  | C | GT | T  | A  | C  | 1427 |    |    |   |      |      |      |      |      |      |      |
| AF306346  | M | T   | A    | AT   | A  | G  | C | GT | T  | A  | C  | 1415 |    |    |   |      |      |      |      |      |      |      |
| U85564    | M | h   | A    | AT   | A  | G  | C | GT | T  | A  | C  | 1417 |    |    |   |      |      |      |      |      |      |      |
| KF743739  | M | T   | A    | AT   | A  | G  | C | GT | T  | A  | C  | 1419 |    |    |   |      |      |      |      |      |      |      |
| KF743738  | M | T   | A    | AT   | A  | G  | C | GT | T  | A  | C  | 1419 |    |    |   |      |      |      |      |      |      |      |
| KF743737  | M | T   | A    | AT   | A  | G  | C | GT | T  | A  | C  | 1419 |    |    |   |      |      |      |      |      |      |      |
| AY383241  | M | A   | C    | AT   | A  | G  | C | GT | T  | A  | C  | 1419 |    |    |   |      |      |      |      |      |      |      |
| AY946266  | M | T   | G    | AT   | A  | G  | C | GT | T  | A  | C  | 1419 |    |    |   |      |      |      |      |      |      |      |
| AY837724  | M | T   | G    | A    | C  | AT | A | G  | C  | GT | T  | 1414 |    |    |   |      |      |      |      |      |      |      |
| AF338268  | M | T   | A    | AT   | A  | G  | C | GT | T  | A  | C  | 1415 |    |    |   |      |      |      |      |      |      |      |
| EUI65512  | M | T   | A    | AT   | A  | G  | C | GT | T  | A  | C  | 1398 |    |    |   |      |      |      |      |      |      |      |
| AB558899  | M | T   | G    | AT   | A  | G  | C | GT | T  | A  | C  | 1406 |    |    |   |      |      |      |      |      |      |      |
| AB558897  | M | T   | A    | AT   | A  | G  | C | GT | T  | A  | C  | 1406 |    |    |   |      |      |      |      |      |      |      |
| AY492086  | M | TC  | T    | GT   | A  | G  | C | GT | T  | A  | C  | 1430 |    |    |   |      |      |      |      |      |      |      |
| KF743726  | P | CT  | C    | G    | T  | C  | A | A  | A  | A  | C  | 1400 |    |    |   |      |      |      |      |      |      |      |
| KF743711  | P | CT  | C    | G    | T  | C  | A | A  | A  | A  | C  | 1401 |    |    |   |      |      |      |      |      |      |      |
| KF743728  | P | CT  | C    | G    | T  | C  | A | A  | A  | A  | C  | 1401 |    |    |   |      |      |      |      |      |      |      |
| KF743721  | P | CT  | T    | G    | T  | C  | A | A  | A  | A  | C  | 1401 |    |    |   |      |      |      |      |      |      |      |
| KF743719  | P | CT  | C    | G    | T  | C  | A | A  | A  | A  | C  | 1410 |    |    |   |      |      |      |      |      |      |      |
| KF743718  | P | CT  | T    | G    | T  | C  | A | A  | A  | A  | C  | 1410 |    |    |   |      |      |      |      |      |      |      |
| KF743716  | P | CT  | T    | G    | T  | C  | A | A  | A  | A  | C  | 1410 |    |    |   |      |      |      |      |      |      |      |
| GU562823  | M | A   | TA   | TC   | A  | TT | G | GG | GG | C  | T  | C    | GT | A  | T | C    | 1379 |      |      |      |      |      |
| HMU82963  | M | TC  | TA   | B    | C  | C  | T | G  | GG | GG | GG | C    | T  | GG | A | ANTT | CC   | 1388 |      |      |      |      |
| DQ157153  | M | A   | TC   | A    | TT | G  | G | G  | G  | G  | G  | G    | G  | G  | G | G    | G    | G    | 1368 |      |      |      |
| AY831867  | M | A   | TC   | A    | TT | G  | G | G  | G  | G  | G  | G    | G  | G  | G | G    | G    | G    | 1384 |      |      |      |
| AY171918  | M | TA  | G    | C    | C  | T  | A | TT | G  | GG | GG | C    | T  | GG | A | A    | ATCC | CC   | 1391 |      |      |      |
| F0667774  | M | TTA | TT   | A    | TT | G  | G | G  | G  | G  | G  | G    | G  | G  | G | G    | G    | G    | 1347 |      |      |      |
| AB820288  | M | TA  | G    | TC   | A  | TT | G | GG | GG | GG | C  | T    | GG | GT | T | C    | A    | AATT | CC   | 1373 |      |      |
| AB848714  | M | A   | T    | TTCC | T  | G  | G | G  | G  | G  | G  | G    | G  | G  | G | G    | G    | G    | G    | 1390 |      |      |
| AY529641  | M | A   | T    | TTCC | T  | G  | G | G  | G  | G  | G  | G    | G  | G  | G | G    | G    | G    | G    | 1385 |      |      |
| AF548631  | M | A   | T    | TTCC | T  | G  | G | G  | G  | G  | G  | G    | G  | G  | G | G    | G    | G    | G    | 1385 |      |      |
| KF743714  | P | A   | T    | TTCC | T  | G  | G | G  | G  | G  | G  | G    | G  | G  | G | G    | G    | G    | G    | 1390 |      |      |
| AB725596  | M | A   | T    | TTCC | T  | G  | G | G  | G  | G  | G  | G    | G  | G  | G | G    | G    | G    | G    | 1357 |      |      |
| KF743709  | P | A   | T    | TTCC | T  | G  | G | G  | G  | G  | G  | G    | G  | G  | G | G    | G    | G    | G    | 1390 |      |      |
| KF743723  | P | A   | T    | TTCC | T  | G  | G | G  | G  | G  | G  | G    | G  | G  | G | G    | G    | G    | G    | 1390 |      |      |
| KF743735  | P | A   | T    | TTCC | T  | G  | G | G  | G  | G  | G  | G    | G  | G  | G | G    | G    | G    | G    | 1390 |      |      |
| KF743732  | P | A   | T    | TTCC | T  | G  | G | G  | G  | G  | G  | G    | G  | G  | G | G    | G    | G    | G    | 1390 |      |      |
| KF743705  | P | A   | T    | TTCC | T  | G  | G | G  | G  | G  | G  | G    | G  | G  | G | G    | G    | G    | G    | 1390 |      |      |
| KF743712  | P | A   | T    | TTCC | T  | G  | G | G  | G  | G  | G  | G    | G  | G  | G | G    | G    | G    | G    | 1390 |      |      |
| KF743725  | P | A   | T    | TTCC | T  | G  | G | G  | G  | G  | G  | G    | G  | G  | G | G    | G    | G    | G    | 1390 |      |      |
| KF743708  | P | A   | T    | TTCC | T  | G  | G | G  | G  | G  | G  | G    | G  | G  | G | G    | G    | G    | G    | 1390 |      |      |
| KF743730  | P | A   | T    | TTCC | T  | G  | G | G  | G  | G  | G  | G    | G  | G  | G | G    | G    | G    | G    | 1390 |      |      |
| GU734681  | M | A   | T    | TTCC | T  | G  | G | G  | G  | G  | G  | G    | G  | G  | G | G    | G    | G    | G    | 1313 |      |      |
| KF743706  | P | TA  | T    | TTCC | T  | AG | T | G  | G  | G  | G  | G    | G  | G  | G | G    | G    | G    | G    | 1391 |      |      |
| KF743734  | P | TA  | T    | TTCC | T  | AG | T | G  | G  | G  | G  | G    | G  | G  | G | G    | G    | G    | G    | 1391 |      |      |
| KF743715  | P | TA  | T    | TTCC | T  | AG | T | G  | G  | G  | G  | G    | G  | G  | G | G    | G    | G    | G    | 1391 |      |      |
| KF743736  | P | TA  | T    | TTCC | T  | AG | T | G  | G  | G  | G  | G    | G  | G  | G | G    | G    | G    | G    | 1391 |      |      |
| KF743704  | P | TA  | T    | TTCC | T  | AG | T | G  | G  | G  | G  | G    | G  | G  | G | G    | G    | G    | G    | 1391 |      |      |
| EP460765  | M | TA  | T    | TT   | G  | T  | G | G  | G  | G  | G  | G    | G  | G  | G | G    | G    | G    | G    | 1392 |      |      |
| KF743710  | P | TA  | T    | TT   | G  | T  | A | TT | G  | G  | G  | G    | G  | G  | G | G    | G    | G    | G    | 1391 |      |      |
| KF743733  | P | C   | TA   | T    | TT | G  | T | A  | TT | G  | G  | G    | G  | G  | G | G    | G    | G    | G    | 1391 |      |      |
| KF743707  | P | TA  | T    | TT   | G  | T  | A | TT | G  | G  | G  | G    | G  | G  | G | G    | G    | G    | G    | 1391 |      |      |
| KF743731  | P | C   | TA   | T    | TT | G  | T | A  | TT | G  | G  | G    | G  | G  | G | G    | G    | G    | G    | 1391 |      |      |
| KF743720  | P | C   | TA   | T    | TT | G  | T | A  | TT | G  | G  | G    | G  | G  | G | G    | G    | G    | G    | 1391 |      |      |
| NR_036946 | M | A   | C    | T    | AA | GT | T | T  | T  | C  | A  | T    | A  | C  | G | AGA  | CGCT | C    | T    | G    | 1433 |      |
| F0236566  | M | A   | C    | T    | AA | GT | T | T  | T  | C  | A  | T    | A  | C  | T | G    | CGCA | CGCT | C    | T    | 1446 |      |
| AF125879  | M | AT  | ATCA | GT   | A  | T  | T | T  | T  | C  | A  | T    | A  | C  | T | G    | CG   | GT   | A    | TATC | A    | 1410 |
| AF125878  | M | T   | ATCA | G    | A  | T  | T | T  | T  | C  | A  | T    | A  | C  | T | G    | CG   | GT   | A    | TATC | A    | 1411 |
| DQ522159  | M | T   | ATCA | G    | A  | T  | T | T  | T  | C  | A  | T    | A  | C  | T | G    | CG   | GT   | A    | TATC | A    | 1416 |

















GU905012 M .....AC.G..A.C..T.....A.....AT.....G..C.G..T.G.....C.....GAGTTAAG-- : 1427  
 AF306346 M .....AC.T..A.C..T.....A.....AT.....A.....GAGTT-- : 1415  
 UB8854 M.H .....AC.G..A.C..T.....A.....AT.....G.....GG.....A.....G..C.G..T.....C.....GAGTTAAG-- : 1417  
 KF743739 M .....AC.G..A.C..T.....A.....AT.....G.....GG.....G..C.GT..A..A.....C.....GAGTTAAGTC : 1419  
 KC920443 P .....AC.G..A.C..T.....A.....AT.....G.....GG.....G..C.GT..A..A.....C.....GAGTTAAGTC : 1414  
 KC920441 P .....AC.G..A.C..T.....A.....AT.....G.....GG.....G..C.GT..A..A.....C.....GAGTTAAGTC : 1414  
 KC920447 P .....AC.G..A.C..T.....A.....AT.....G.....GG.....G..C.GT..A..A.....C.....GAGTTAAGTC : 1414  
 KC920446 P .....AC.G..A.C..T.....A.....AT.....G.....GG.....G..C.GT..A..A.....C.....GAGTTAAGTC : 1414  
 KC920445 P .....AC.G..A.C..T.....A.....AT.....G.....GG.....G..C.GT..A..A.....C.....GAGTTAAGTC : 1414  
 KC920444 P .....AC.G..A.C..T.....A.....AT.....G.....GG.....G..C.GT..A..A.....C.....GAGTTAAGTC : 1414  
 KC920442 P .....AC.G..A.C..T.....A.....AT.....G.....GG.....G..C.GT..A..A.....C.....GAGTTAAGTC : 1414  
 KC920448 P .....AC.G..A.C..T.....A.....AT.....G.....GG.....G..C.GT..A..A.....C.....GAGTTAAGTC : 1414  
 KC920440 P .....AC.G..A.C..T.....A.....AT.....G.....GG.....G..C.GT..A..A.....C.....GAGTTAAGTC : 1414  
 KC920439 P .....AC.G..A.C..T.....A.....AT.....A.....G.....GG.....G..C.GT..A..A.....C.....GAGTTAAGTC : 1414  
 AF198676 M .....C..ACT..T.C..T.....A.....AT.....A.....G.....GG.....G..C.GT..A..A.....C.....GAGTTAAGTC : 1411  
 AF338269 M .....C..ACT..T.C..T.....A.....AT.....A.....G.....GG.....G..C.GT..A..A.....C.....GAGTTAAGTC : 1411  
 KF743738 M .....A..G..A.C..T.....A.....AT.....A.....G.....GG.....G..C.GT..A..A.....C.....GAGTTAAGTC : 1419  
 KF743737 M .....A..G..A.C..T.....A.....AT.....A.....G.....GG.....G..C.GT..A..A.....C.....GAGTTAAGTC : 1419  
 AY383241 M .....A..AC...A.C..T.....A.....AT.....A.....G.....GG.....G..C.GT..T..A.....C.....GAGTTAAGTC : 1419  
 AY946266 M .....AC.T..C..T.....A.....AT.....A.....G.....GG.....G..C.GT..T..A.....C.....GAGTTAAGTC : 1411  
 AY837724 M .....AC.T..C..T.....A.....AT.....A.....G.....GG.....G..C.GT..T..A.....C.....GAGTTAAGTC : 1414  
 AF338268 M .....AC.G..A.C..T.....A.....AT.....A.....G.....GG.....G..C.GT..T..A.....C.....GAGTTAAGTC : 1415  
 EU165512 M .....AC.G..A.C..T.....A.....AT.....A.....G.....GG.....G..C.GT..T..A.....C.....GAGTTAAGTC : 1398  
 AB558899 M .....AC.T..C..T.....A.....AT.....A.....G.....GG.....G..C.GT..T..A.....C.....GAGTTAAGTC : 1406  
 AB558897 M .....AC.G..A.C..T.....A.....AT.....A.....G.....GG.....G..C.GT..T..A.....C.....GAGTTAAGTC : 1406  
 AY492086 M .....TC..AC.T..TC..T.....A.....AT.....A.....G.....GG.....G..C.GT..T..A.....C.....GAGTTAAGTC : 1430  
 HM082953 M .....C..ACTA...CC..T.....A.....AT.....A.....G.....GG.....G..C.GT..T..A.....C.....GAGTTAAGTC : 1388  
 DQ157153 M .....AC.A...C..T.....A.....AT.....A.....G.....GG.....G..C.GT..T..A.....C.....GAGTTAAGTC : 1368  
 AY831867 M .....AC.A...C..T.....A.....AT.....A.....G.....GG.....G..C.GT..T..A.....C.....GAGTTAAGTC : 1384  
 AY171918 M .....ACTA..G..C..C..T.....A.....AT.....A.....G.....GG.....G..C.GT..T..A.....C.....GAGTTAAGTC : 1391  
 F0667774 M .....A..TA...T.C..T.....A.....AT.....A.....G.....GG.....G..C.GT..T..A.....C.....GAGTTAAGTC : 1347  
 AB820288 M .....ACTA...C..T.....A.....AT.....A.....G.....GG.....G..C.GT..T..A.....C.....GAGTTAAGTC : 1373  
 AB84874 M .....AC.A..T.T.CG.T..T..G.....G.....G..G.GTGGC.T..TA..T..T.....TA..G..AAC..C.....GAGTTAAGTC : 1390  
 AY529641 M .....AC.A..T.T.CG.T..T..G.....G.....G..G.GTGGC.T..TA..T..T.....TA..G..AAC..C.....GAGTTAAGTC : 1385  
 AF548631 M .....AC.A..T.T.CG.T..T..G.....G.....G..G.GTGGC.T..TA..T..T.....TA..G..AAC..C.....GAGTTAAGTC : 1385  
 KF743734 P .....AC.A..T.T.CG.T..T..G.....G.....G..G.GTGGC.T..TA..T..T.....TA..G..AAC..C.....GAGTTAAGTC : 1390  
 AB725596 M .....AC.A..T.T.CG.T..T..G.....G.....G..G.GTGGC.T..TA..T..T.....TA..G..AAC..C.....GAGTTAAGTC : 1357  
 KF743709 P .....AC.A..T.T.CG.T..T..G.....G.....G..G.GTGGC.T..TA..T..T.....TA..G..AAC..C.....GAGTTAAGTC : 1390  
 KF743723 P .....AC.A..T.T.CG.T..T..G.....G.....G..G.GTGGC.T..TA..T..T.....TA..G..AAC..C.....GAGTTAAGTC : 1390  
 KF743735 P .....AC.A..T.T.CG.T..T..G.....G.....G..G.GTGGC.T..TA..T..T.....TA..G..AAC..C.....GAGTTAAGTC : 1390  
 KF743732 P .....AC.A..T.T.CG.T..T..G.....G.....G..G.GTGGC.T..TA..T..T.....TA..G..AAC..C.....GAGTTAAGTC : 1390  
 KF743705 P .....AC.A..T.T.CG.T..T..G.....G.....G..G.GTGGC.T..TA..T..T.....TA..G..AAC..C.....GAGTTAAGTC : 1390  
 KF743712 P .....AC.A..T.T.CG.T..T..G.....G.....G..G.GTGGC.T..TA..T..T.....TA..G..AAC..C.....GAGTTAAGTC : 1390  
 KF743725 P .....AC.A..T.T.CG.T..T..G.....G.....G..G.GTGGC.T..TA..T..T.....TA..G..AAC..C.....GAGTTAAGTC : 1390  
 KF743708 P .....AC.A..T.T.CG.T..T..G.....G.....G..G.GTGGC.T..TA..T..T.....TA..G..AAC..C.....GAGTTAAGTC : 1390  
 KF743730 P .....AC.A..T.T.CG.T..T..G.....G.....G..G.GTGGC.T..TA..T..T.....TA..G..AAC..C.....GAGTTAAGTC : 1390  
 GU734681 M .....AC.A..T.T.CG.T..T..G.....G.....G..G.GTGGC.T..TA..T..T.....TA..G..AAC..C.....GAGTTAAGTC : 1313  
 KF743706 P .....ACTA..T.T.CG.T..T..AG.....T.....G.....G..G.GTGGCCT..TA..T..T.....TA..A..AAC..C.....GAGTTAAGTC : 1391  
 KF743734 P .....ACTA..T.T.CG.T..T..AG.....T.....G.....G..G.GTGGCCT..TA..T..T.....TA..A..AAC..C.....GAGTTAAGTC : 1391  
 KF743715 P .....ACTA..T.T.CG.T..T..AG.....T.....G.....G..G.GTGGCCT..TA..T..T.....TA..A..AAC..C.....GAGTTAAGTC : 1391  
 KF743736 P .....ACTA..T.T.CG.T..T..AG.....T.....G.....G..G.GTGGCCT..TA..T..T.....TA..A..AAC..C.....GAGTTAAGTC : 1391  
 KF743704 P .....ACTA..T.T.CG.T..T..AG.....T.....G.....G..G.GTGGCCT..TA..T..T.....TA..A..AAC..C.....GAGTTAAGTC : 1391  
 EP460765 M .....ACTA..T.T.G.T..T.....T.....G.....G..G.GTGGC.T..TGT..T..T.....CA..G..AAC..C..G..GAGTTAAGTC : 1392  
 KF743710 P .....ACTA..T.T.G.T..T.....T.....T.....G.....G..G.GTGGC.T..TA..T..T.....TA..A..AAT.C.C.....GAGTTAAGTC : 1391  
 KF743733 P .....C..ACTA..T.T.G.T..T.....A.....TT.....G.....G..G.GTGGC.T..TA..T..T.....TA..A..AAT.C.C.....GAGTTAAGTC : 1391  
 KF743707 P .....ACTA..T.T.G.T..T.....A.....TT.....G.....G..G.GTGGC.T..TA..T..T.....TA..A..AAT.C.C.....GAGTTAAGTC : 1391  
 KF743731 P .....C..ACTA..T.T.G.T..T.....A.....TT.....G.....G..G.GTGGC.T..TA..T..T.....TA..A..AAT.C.C.....GAGTTAAGTC : 1391  
 KF743720 P .....C..ACTA..T.T.G.T..T.....A.....TT.....G.....G..G.GTGGC.T..TA..T..T.....TA..A..AAT.C.C.....GAGTTAAGTC : 1391  
 NR\_036946 .....A..C.TCAA..A.CGT..T..T..T.....T.....C..A..T..A.....C.....G..AGA.....CGCT..C.....T.G.....C..GG..CTG.....A.GCCCG..GT..G..T..TAA.....GAAACT..C..AGGCA..G..C..GG..C..GGTTAAGTC : 1433  
 F0236566 M .....A..C.TCAA..A.CA..T..T..T.....T.....C..A..T..A.....C.....G..AGA.....CGCT..C.....T.G.....C..GG..CTG.....A.GCCCG..GT..G..T..TAA.....GAAACT..C..AGGCA..G..C..GG..C..GGTTAAGTC : 1446  
 AF125879 M .....AT..AT..A..A..TCA..T..T..T.....T.....C..A..T..A.....C.....G..AGA.....CGCT..C.....T.G.....C..GG..CTG.....A.GCCCG..GT..G..T..TAA.....GAAACT..C..AGGCA..G..C..GG..C..GGTTAAGTC : 1410  
 AF125878 M .....T..AT..A..A..CA..T..T..T.....T.....C..A..T..A.....C.....G..AGA.....CGCT..C.....T.G.....C..GG..CTG.....A.GCCCG..GT..G..T..TAA.....GAAACT..C..AGGCA..G..C..GG..C..GGTTAAGTC : 1411  
 DQ522159 M .....T..AT..A..A..CA..T..T..T.....T.....C..A..T..A.....C.....G..AGA.....CGCT..C.....T.G.....C..GG..CTG.....A.GCCCG..GT..G..T..TAA.....GAAACT..C..AGGCA..G..C..GG..C..GGTTAAGTC : 1416





|          |   |   |     |    |    |    |    |    |   |   |   |    |    |    |   |   |   |   |   |   |   |   |      |      |      |                       |                       |                       |     |     |     |     |
|----------|---|---|-----|----|----|----|----|----|---|---|---|----|----|----|---|---|---|---|---|---|---|---|------|------|------|-----------------------|-----------------------|-----------------------|-----|-----|-----|-----|
| AF338269 | M | T | GCC | G  | G  | G  | G  | G  | G | T | C | T  | G  | T  | T | A | T | C | G | T | T | C | A    | C    | TTTA | A                     | AAAG                  | CATGATAGGAATGATTAGCCT | C   | AAA | T   | 478 |
| KF743738 | M | C | G   | G  | G  | A  | G  | TC | C | G | A | T  | G  | GA | T | T | A | T | T | C | A | T | C    | A    | TTTA | A                     | AAAG                  | CTTGATAGGAATGATTAGCCT | T   | AAA | T   | 484 |
| KF743735 | P | C | A   | G  | G  | A  | G  | TC | C | G | A | T  | G  | GA | T | T | A | T | T | C | A | T | C    | A    | TTTA | A                     | AAAG                  | CTTGATAGGAATGATTAGCCT | T   | AAA | T   | 480 |
| AY383241 | M | C | GT  | G  | G  | G  | G  | CC | C | G | A | T  | G  | GA | T | T | A | T | T | C | A | T | C    | A    | TTTA | A                     | AAAG                  | CTTGATAGGAATGATTAGCCT | C   | AAA | T   | 477 |
| AY946266 | M | C | AG  | G  | G  | A  | G  | T  | C | G | A | T  | G  | GA | T | T | A | T | T | C | A | T | C    | A    | TTTA | A                     | AAAG                  | CGCGCTAGGAATGAGCGCCCT | G   | AAI | T   | 470 |
| AY383724 | M | C | A   | G  | G  | A  | G  | T  | C | G | A | T  | G  | GA | T | T | A | T | T | C | A | T | C    | A    | TTTA | A                     | AAAG                  | CGCGCTAGGAATGAGCGCCCT | G   | AAI | T   | 480 |
| AF338268 | M | C | A   | G  | G  | A  | G  | T  | C | G | A | T  | G  | GA | T | T | A | T | T | C | A | T | C    | A    | TTTA | A                     | AAAG                  | CGCGCTAGGAATGAGCGCCCT | G   | AAI | T   | 481 |
| EU165512 | M | C | A   | G  | G  | A  | G  | T  | C | G | A | T  | G  | GA | T | T | A | T | T | C | A | T | C    | A    | TTTA | A                     | AA                    | AGCGCTAGGAATGAGCGCCCT | G   | AAI | T   | 464 |
| AB858899 | M | C | A   | G  | G  | A  | G  | T  | C | G | A | T  | G  | GA | T | T | A | T | T | C | A | T | C    | A    | TTTA | A                     | AAAG                  | CGCGCTAGGAATGAGCGCCCT | G   | AAI | T   | 481 |
| AB558897 | M | C | A   | G  | G  | AA | G  | T  | C | G | A | T  | G  | GA | T | T | A | T | T | C | A | T | C    | A    | TTTA | A                     | AAAG                  | CGCGCTAGGAATGAGCGCCCT | G   | AAI | T   | 481 |
| AY492086 | M | C | G   | G  | A  | G  | T  | G  | A | T | C | G  | A  | GA | T | T | A | T | T | C | A | T | C    | A    | TTTA | A                     | AAAG                  | CGCGCTAGGAATGAGCGCCCT | T   | AAI | T   | 495 |
| BB082863 | M | T | AG  | GC | TA | G  | TA | G  | A | T | C | G  | A  | GA | T | T | A | T | T | C | A | T | C    | A    | TTTA | A                     | AAAG                  | CGCGCTAGGAATGAGCGCCCT | T   | AAI | T   | 497 |
| DQ157153 | M | G | G   | G  | A  | G  | T  | G  | A | T | C | G  | A  | GA | T | T | A | T | T | C | A | T | C    | A    | TTTA | A                     | AAAG                  | CGCGCTAGGAATGAGCGCCCT | T   | AAI | T   | 495 |
| AY81867  | M | G | G   | A  | G  | T  | G  | A  | T | C | G | A  | GA | T  | T | A | T | T | C | A | T | C | A    | TTTA | A    | AAAG                  | CGCGCTAGGAATGAGCGCCCT | T                     | AAI | T   | 495 |     |
| AY11918  | M | G | G   | A  | G  | T  | G  | A  | T | C | G | A  | GA | T  | T | A | T | T | C | A | T | C | A    | TTTA | A    | AAAG                  | CGCGCTAGGAATGAGCGCCCT | T                     | AAI | T   | 495 |     |
| FJ667774 | M | A | G   | T  | C  | G  | A  | T  | C | G | A | GA | T  | T  | A | T | T | C | A | T | C | A | TTTA | A    | AAAG | CGCGCTAGGAATGAGCGCCCT | T                     | AAI                   | T   | 495 |     |     |
| AB820288 | M | G | G   | A  | G  | T  | G  | A  | T | C | G | A  | GA | T  | T | A | T | T | C | A | T | C | A    | TTTA | A    | AAAG                  | CGCGCTAGGAATGAGCGCCCT | T                     | AAI | T   | 495 |     |
| FJ28566  | M | C | AGT | C  | G  | C  | A  | T  | C | G | A | GA | T  | T  | A | T | T | C | A | T | C | A | TTTA | A    | AAAG | CGCGCTAGGAATGAGCGCCCT | T                     | AAI                   | T   | 495 |     |     |
| AF125879 | M | T | G   | GC | TA | G  | TA | G  | A | T | C | G  | A  | GA | T | T | A | T | T | C | A | T | C    | A    | TTTA | A                     | AAAG                  | CGCGCTAGGAATGAGCGCCCT | T   | AAI | T   | 482 |
| AF125878 | M | T | G   | GC | TA | G  | TA | G  | A | T | C | G  | A  | GA | T | T | A | T | T | C | A | T | C    | A    | TTTA | A                     | AAAG                  | CGCGCTAGGAATGAGCGCCCT | T   | AAI | T   | 482 |
| DQ523159 | M | C | GT  | G  | TA | G  | TA | G  | A | T | C | G  | A  | GA | T | T | A | T | T | C | A | T | C    | A    | TTTA | A                     | AAAG                  | CGCGCTAGGAATGAGCGCCCT | T   | AAI | T   | 482 |
| DQ523159 | M | C | GT  | G  | TA | G  | TA | G  | A | T | C | G  | A  | GA | T | T | A | T | T | C | A | T | C    | A    | TTTA | A                     | AAAG                  | CGCGCTAGGAATGAGCGCCCT | T   | AAI | T   | 482 |

|                                                                                         |                                                                                                 |                                                 |     |     |     |     |     |     |     |     |     |      |
|-----------------------------------------------------------------------------------------|-------------------------------------------------------------------------------------------------|-------------------------------------------------|-----|-----|-----|-----|-----|-----|-----|-----|-----|------|
| 520                                                                                     | 540                                                                                             | 560                                             | 580 | 600 | 620 | 640 | 660 | 680 | 700 | 720 | 740 |      |
| CGCGGTAATACATAGTCCGACGATTATCGGATTATGGCGTAAGCAAGCCAGCGGGATGTGTAAGTTCTGTGTTAAATGACACTCAAT | AGTTGTTTGACCCGAATCACTACATGTGAGATGTTGGTAGGAGTTCGGAATTAAGCATTGAGCGGTGGAATGTGATAGTCTTAAAGAACACACAG | AGCGAAGCGGAACCTTAGCCCTTAATGACGCTTAGGCTGAAAGTGTG |     |     |     |     |     |     |     |     |     |      |
| 760                                                                                     | 780                                                                                             | 800                                             | 820 | 840 | 860 | 880 | 900 | 920 | 940 | 960 | 980 | 1000 |
| GGGACAAATGGGA                                                                           | TTAGATACCCGACTAGT                                                                               | CCACACCGTAACAGTGGGATAGGATGGGG                   |     |     |     |     |     |     |     |     |     |      |



|            |      |        |        |     |     |     |     |      |
|------------|------|--------|--------|-----|-----|-----|-----|------|
| KF743725_P | C    | G      | C      | A   | A   | C   | G   | 1390 |
| KF743708_P | C    | G      | C      | K   | A   | C   | G   | 1390 |
| KF743730_P | C    | G      | C      | A   | A   | C   | G   | 1390 |
| NR_036946  | A    | C      | T      | A   | A   | A   | A   | 1433 |
| KF743710_P | T    | A      | T      | A   | A   | T   | C   | 1391 |
| KF743733_P | C    | A      | T      | A   | A   | T   | C   | 1391 |
| KF743707_P | T    | A      | T      | A   | A   | T   | C   | 1391 |
| KF743731_P | C    | T      | A      | T   | A   | T   | C   | 1391 |
| KF743720_P | C    | T      | A      | T   | A   | T   | C   | 1391 |
| GU734681_M | C    | G      | C      | A   | A   | C   | G   | 1313 |
| EF460765_M | T    | G      | T      | C   | A   | G   | T   | 1392 |
| KF743726_P | CTCC | AGC    | TA     | C   | C   | GA  | T   | 1401 |
| KF743711_P | CTCC | AGC    | TA     | C   | C   | GA  | T   | 1401 |
| KF743728_P | CTCC | AGC    | TA     | C   | C   | GA  | T   | 1401 |
| KF743721_P | CTCC | AGC    | TA     | C   | C   | GA  | T   | 1401 |
| KF743719_P | CTCC | AGC    | TA     | C   | C   | GA  | T   | 1410 |
| KF743718_P | CTCC | AGC    | TA     | C   | C   | GA  | T   | 1410 |
| KF743716_P | CTCC | AGC    | TA     | C   | C   | GA  | T   | 1410 |
| GU562823_M | A    | A      | C      | A   | C   | A   | T   | 1379 |
| KF743729_P | CC   | AACCTA | C      | A   | A   | A   | T   | 1415 |
| KF743724_P | CC   | AACCTA | C      | A   | A   | A   | T   | 1415 |
| KF743727_P | CC   | AACCTA | C      | A   | A   | A   | T   | 1415 |
| KF743722_P | CC   | AACCTA | C      | A   | A   | A   | T   | 1415 |
| KF743713_P | CC   | AACCTA | C      | A   | A   | A   | T   | 1415 |
| KC936280_P | CC   | AACCTA | C      | A   | A   | A   | T   | 1415 |
| KF743717_P | CC   | AACCTA | C      | A   | A   | A   | T   | 1415 |
| AB848713_M | CT   | AACCTA | C      | A   | A   | A   | T   | 1393 |
| GU905012_M | CG   | AACCTA | C      | A   | A   | A   | T   | 1427 |
| AF306346_M | CT   | AACCTA | C      | A   | A   | A   | T   | 1415 |
| US8954_W.H | CG   | AACCTA | C      | A   | A   | A   | T   | 1417 |
| KF743739_M | CG   | AACCTA | C      | A   | A   | A   | T   | 1419 |
| KC920443_P | CG   | AACCTA | C      | A   | A   | A   | T   | 1414 |
| KC920447_P | CG   | AACCTA | C      | A   | A   | A   | T   | 1414 |
| KC920446_P | CG   | AACCTA | C      | A   | A   | A   | T   | 1414 |
| KC920445_P | CG   | AACCTA | C      | A   | A   | A   | T   | 1414 |
| KC920444_P | CG   | AACCTA | C      | A   | A   | A   | T   | 1414 |
| KC920442_P | CG   | AACCTA | C      | A   | A   | A   | T   | 1414 |
| KC920448_P | CG   | AACCTA | C      | A   | A   | A   | T   | 1414 |
| KC920440_P | CG   | AACCTA | C      | A   | A   | A   | T   | 1414 |
| KC920439_P | CG   | AACCTA | C      | A   | A   | A   | T   | 1414 |
| AF178676_M | CG   | AACCTA | C      | A   | A   | A   | T   | 1414 |
| AF338269_M | C    | A      | A      | A   | A   | A   | A   | 1411 |
| KF743738_M | TCG  | AACCTA | C      | A   | A   | A   | T   | 1419 |
| KF743737_M | CG   | AACCTA | C      | A   | A   | A   | T   | 1419 |
| AY383241_M | A    | CC     | AACCTA | C   | A   | A   | T   | 1419 |
| AY946266_M | CT   | AGCCTA | C      | A   | A   | A   | T   | 1411 |
| AY837724_M | CT   | AGCCTA | C      | A   | A   | A   | T   | 1414 |
| AF338268_M | CT   | AACCTA | C      | A   | A   | A   | T   | 1415 |
| EU165512_M | CG   | AACCTA | C      | A   | A   | A   | T   | 1398 |
| AB558899_M | CT   | AGCCTA | C      | A   | A   | A   | T   | 1406 |
| AB558897_M | CG   | AACCTA | C      | A   | A   | A   | T   | 1406 |
| AY492086_M | TC   | CT     | AG     | CTA | C   | A   | A   | 1430 |
| HM092963_M | C    | C      | A      | C   | A   | C   | A   | 1368 |
| DQ157153_M | C    | A      | C      | A   | C   | A   | T   | 1368 |
| AY831867_M | C    | A      | C      | A   | C   | A   | T   | 1384 |
| AY171918_M | G    | C      | T      | C   | A   | T   | A   | 1391 |
| FJ667774_M | T    | A      | A      | C   | A   | T   | G   | 1347 |
| AB820288_M | AGC  | A      | C      | A   | T   | A   | G   | 1373 |
| FJ226566_M | A    | C      | T      | A   | A   | A   | A   | 1446 |
| AF125879_M | AT   | ATCAC  | AG     | CNA | TGA | C   | TCA | 1410 |
| AF125878_M | T    | ATCAC  | AGCCAA | TGA | C   | TCA | A   | 1411 |
| DQ522159_M | T    | ATCAC  | AGCCAA | TGA | C   | TCA | A   | 1416 |

# FIG S7: 16S Raccoon Hemoplasma Genotype 2

```

          20          40          60          80          100          120          140          160          180          200          220          240
KF743728_P CGTGGTGTATGCATCAACAGTCAAGTCTCGACGAAAGAAAGT-----TTTTCTCTTTTGTGGCAAAAGGGGGGCAAGTAACTATTAACTTACTCGCAGCAGAAATTAACCTCCCGAAAGGGTGGCTAATGTCCCATATGTTTGTAG-GA-----ATAAATTAAG-----GGGAGCGTTCCCGAAGGCTCGACCTGCAACGCAAGATATGTCTATTAGGTAGTTGGCGGGGTAATGCCCAACCA
KF743724_P -----GCGAAGGCGAGTCCAGCAGTCCATCAAGG-----
KF743727_P -----GCGAAGGCGAGTCCAGCAGTCCATCAAGG-----
KF743722_P -----GCGAAGGCGAGTCCAGCAGTCCATCAAGG-----
KF743713_P -----GCGAAGGCGAGTCCAGCAGTCCATCAAGG-----
KC936280_P -----GCGAAGGCGAGTCCAGCAGTCCATCAAGG-----
KF743717_P -----GCGAAGGCGAGTCCAGCAGTCCATCAAGG-----
AB848131_M -----GCGAAGGCGAGTCCAGCAGTCCATCAAGG-----
GU905012_M -----GCGAAGGCGAGTCCAGCAGTCCATCAAGG-----
AF306346_M -----GCGAAGGCGAGTCCAGCAGTCCATCAAGG-----
UR8594_W.B -----GCGAAGGCGAGTCCAGCAGTCCATCAAGG-----
KF743739_M -----GCGAAGGCGAGTCCAGCAGTCCATCAAGG-----
KC920443_P -----GCGAAGGCGAGTCCAGCAGTCCATCAAGG-----
KC920441_P -----GCGAAGGCGAGTCCAGCAGTCCATCAAGG-----
KC920447_P -----GCGAAGGCGAGTCCAGCAGTCCATCAAGG-----
KC920446_P -----GCGAAGGCGAGTCCAGCAGTCCATCAAGG-----
KC920445_P -----GCGAAGGCGAGTCCAGCAGTCCATCAAGG-----
KC920444_P -----GCGAAGGCGAGTCCAGCAGTCCATCAAGG-----
KC920442_P -----GCGAAGGCGAGTCCAGCAGTCCATCAAGG-----
KC920448_P -----GCGAAGGCGAGTCCAGCAGTCCATCAAGG-----
KC920440_P -----GCGAAGGCGAGTCCAGCAGTCCATCAAGG-----
KC920439_P -----GCGAAGGCGAGTCCAGCAGTCCATCAAGG-----
AF178676_M -----GCGAAGGCGAGTCCAGCAGTCCATCAAGG-----
AF338269_M -----GCGAAGGCGAGTCCAGCAGTCCATCAAGG-----
KF743738_M -----GCGAAGGCGAGTCCAGCAGTCCATCAAGG-----
KF743737_M -----GCGAAGGCGAGTCCAGCAGTCCATCAAGG-----
AY383241_M -----GCGAAGGCGAGTCCAGCAGTCCATCAAGG-----
AY946266_M -----GCGAAGGCGAGTCCAGCAGTCCATCAAGG-----
SF743724_M -----GCGAAGGCGAGTCCAGCAGTCCATCAAGG-----
AF338268_M -----GCGAAGGCGAGTCCAGCAGTCCATCAAGG-----
EU165512_M -----GCGAAGGCGAGTCCAGCAGTCCATCAAGG-----
AB558899_M -----GCGAAGGCGAGTCCAGCAGTCCATCAAGG-----
AB558897_M -----GCGAAGGCGAGTCCAGCAGTCCATCAAGG-----
AY492086_M -----GCGAAGGCGAGTCCAGCAGTCCATCAAGG-----
KF743726_P -----GCGAAGGCGAGTCCAGCAGTCCATCAAGG-----
KF743711_P -----GCGAAGGCGAGTCCAGCAGTCCATCAAGG-----
KF743728_P -----GCGAAGGCGAGTCCAGCAGTCCATCAAGG-----
SF743721_P -----GCGAAGGCGAGTCCAGCAGTCCATCAAGG-----
KF743719_P -----GCGAAGGCGAGTCCAGCAGTCCATCAAGG-----
KF743718_P -----GCGAAGGCGAGTCCAGCAGTCCATCAAGG-----
KF743717_P -----GCGAAGGCGAGTCCAGCAGTCCATCAAGG-----
GU562823_M -----GCGAAGGCGAGTCCAGCAGTCCATCAAGG-----
HMU82963_M -----GCGAAGGCGAGTCCAGCAGTCCATCAAGG-----
DS157153_M -----GCGAAGGCGAGTCCAGCAGTCCATCAAGG-----
AY831867_M -----GCGAAGGCGAGTCCAGCAGTCCATCAAGG-----
AY171918_M -----GCGAAGGCGAGTCCAGCAGTCCATCAAGG-----
F1667774_M -----GCGAAGGCGAGTCCAGCAGTCCATCAAGG-----
AB820288_M -----GCGAAGGCGAGTCCAGCAGTCCATCAAGG-----
AB848714_M -----GCGAAGGCGAGTCCAGCAGTCCATCAAGG-----
AY529659_M -----GCGAAGGCGAGTCCAGCAGTCCATCAAGG-----
AF548631_M -----GCGAAGGCGAGTCCAGCAGTCCATCAAGG-----
KF743714_P -----GCGAAGGCGAGTCCAGCAGTCCATCAAGG-----
AB71559596_M -----GCGAAGGCGAGTCCAGCAGTCCATCAAGG-----
KF743709_P -----GCGAAGGCGAGTCCAGCAGTCCATCAAGG-----
KF743723_P -----GCGAAGGCGAGTCCAGCAGTCCATCAAGG-----
KF743722_P -----GCGAAGGCGAGTCCAGCAGTCCATCAAGG-----
KF743705_P -----GCGAAGGCGAGTCCAGCAGTCCATCAAGG-----
KF743710_P -----GCGAAGGCGAGTCCAGCAGTCCATCAAGG-----
KF743725_P -----GCGAAGGCGAGTCCAGCAGTCCATCAAGG-----
KF743708_P -----GCGAAGGCGAGTCCAGCAGTCCATCAAGG-----
KF743730_P -----GCGAAGGCGAGTCCAGCAGTCCATCAAGG-----
GU734688_P -----GCGAAGGCGAGTCCAGCAGTCCATCAAGG-----
KF743706_P -----GCGAAGGCGAGTCCAGCAGTCCATCAAGG-----
KF743734_P -----GCGAAGGCGAGTCCAGCAGTCCATCAAGG-----
KF743735_P -----GCGAAGGCGAGTCCAGCAGTCCATCAAGG-----
KF743736_P -----GCGAAGGCGAGTCCAGCAGTCCATCAAGG-----
KF743704_P -----GCGAAGGCGAGTCCAGCAGTCCATCAAGG-----
AF74407185_M -----GCGAAGGCGAGTCCAGCAGTCCATCAAGG-----
KF743710_P -----GCGAAGGCGAGTCCAGCAGTCCATCAAGG-----
KF743733_P -----GCGAAGGCGAGTCCAGCAGTCCATCAAGG-----
KF743707_P -----GCGAAGGCGAGTCCAGCAGTCCATCAAGG-----
KF743731_P -----GCGAAGGCGAGTCCAGCAGTCCATCAAGG-----
AF1252879_M -----GCGAAGGCGAGTCCAGCAGTCCATCAAGG-----
AF9251159_M -----GCGAAGGCGAGTCCAGCAGTCCATCAAGG-----

          260          280          300          320          340          360          380          400          420          440          460          480          500
KF743728_P GCCTTTGATGGGTAGCTGGAGCTGAGAGTGGGAAGCGGCCAATGGGATGAGATATGGCCCATATTCTCTCGGAAGCAGCAGTGAAGAAATTTTCACAAATGGACGAAGTCTGATGGACGAATACCAGCTGAACACGGAAGGCTTCCT--GATTTAAATGCTTTTTATTTGGGAATAAAG--CTTAGACAGAAATGGTGGAGCTTGATGTAATAAATGAAATAGTAGACACTAACTATGTTGCCAGGAG
KF743724_P -----
KF743727_P -----
KF743722_P -----
KF743713_P -----
KC936280_P -----
KF743717_P -----
AB848131_M -----
GU905012_M -----
AF306346_M -----
UR8594_W.B -----
KF743739_M -----
KC920443_P -----
KC920441_P -----
KC920447_P -----
KC920446_P -----
KC920445_P -----
KC920444_P -----
KC920442_P -----
KC920448_P -----
KC920440_P -----
KC920439_P -----
AF178676_M -----
AF338269_M -----
KF743738_M -----
KF743737_M -----
AY383241_M -----
AY946266_M -----
SF743724_M -----
AF338268_M -----
EU165512_M -----
AB558899_M -----
AB558897_M -----
AY492086_M -----
SF743726_P -----
KF743711_P -----
KF743728_P -----
SF743721_P -----
KF743719_P -----
KF743718_P -----
KF743717_P -----
GU562823_M -----
HMU82963_M -----
DS157153_M -----
AY831867_M -----
AY171918_M -----
F1667774_M -----
AB820288_M -----
AB848714_M -----
AY529659_M -----
AF548631_M -----
KF743714_P -----
AB71559596_M -----
KF743709_P -----
KF743723_P -----
KF743722_P -----
KF743705_P -----
KF743710_P -----
KF743725_P -----
KF743708_P -----
KF743730_P -----
GU734688_P -----
KF743706_P -----
KF743734_P -----
KF743735_P -----
KF743736_P -----
KF743704_P -----
AF74407185_M -----
KF743710_P -----
KF743733_P -----
KF743707_P -----
KF743731_P -----
AF1252879_M -----
AF9251159_M -----

          260          280          300          320          340          360          380          400          420          440          460          480          500

```

Genomic coordinates and sequence alignments for various samples (e.g., KF743712, KF743725, etc.) with corresponding reference sequences and quality scores.

Detailed genomic coordinates and sequence alignments for a larger region, including sample identifiers like KF743729, KF743724, and various reference sequences.

Continuation of genomic coordinates and sequence alignments, showing sample identifiers and reference sequences for coordinates up to 1000.



|           |   |                                                                                                                                                                                                                                                                        |      |
|-----------|---|------------------------------------------------------------------------------------------------------------------------------------------------------------------------------------------------------------------------------------------------------------------------|------|
| KC920445  | P | .....G.....G.....CC.....T.....A..A.TC..C...G-----G.....                                                                                                                                                                                                                | 1414 |
| KC920444  | P | .....G.....G.....CC.....T.....A..A.TC..C...G-----G.....                                                                                                                                                                                                                | 1414 |
| KC920442  | P | .....G.....G.....CC.....T.....A..A.TC..C...G-----G.....                                                                                                                                                                                                                | 1414 |
| KC920448  | P | .....G.....G.....CC.....T.....A..A.TC..C...G-----G.....                                                                                                                                                                                                                | 1414 |
| KC920440  | P | .....G.....G.....CC.....T.....A..A.TC..C...G-----G.....                                                                                                                                                                                                                | 1414 |
| KC920439  | P | .....G.....G.....CC.....T.....A..A.TC..C...G-----G.....                                                                                                                                                                                                                | 1414 |
| AF178676  | M | .....G.....A.....G.....T.....A.....C.....G-----A.....                                                                                                                                                                                                                  | 1414 |
| AF338269  | M | .....C.....T.....T.....G.....G.....T.....C.....A.....G-----T.....A.....                                                                                                                                                                                                | 1411 |
| KF743738  | M | .....T.....G.....G.....GG.....T.....A.....C.....G-----T.....A.....                                                                                                                                                                                                     | 1419 |
| KF743737  | M | .....G.....G.....GG.....T.....A.....C.....G-----T.....A.....                                                                                                                                                                                                           | 1419 |
| AY383241  | M | .....A.....T.....G.....C.....T.....CA.....AC.....C.....G-----T.....                                                                                                                                                                                                    | 1419 |
| AY846266  | M | .....T.....G.....C.....T.....CA.....AC.....C.....G-----T.....                                                                                                                                                                                                          | 1414 |
| AY837724  | M | .....T.....G.....C.....T.....CA.....AC.....C.....G-----T.....                                                                                                                                                                                                          | 1414 |
| AF338268  | M | .....G.....A.....T.....TC.....CA.....C.....C.....G-----T.....                                                                                                                                                                                                          | 1415 |
| EUI65512  | M | .....T.....G.....T.....TC.....CA.....A.....C.....G-----T.....                                                                                                                                                                                                          | 1398 |
| AB558899  | M | .....T.....G.....G.....T.....CA.....C.....A.....G-----T.....C.....                                                                                                                                                                                                     | 1406 |
| AB558897  | M | .....G.....T.....TC.....CA.....A.....C.....G-----T.....                                                                                                                                                                                                                | 1406 |
| AY492086  | M | .....TC.....GT.....G.....T.....C.....G.....CC.....A.....T.....CA.....A.....A.TC.....C.....G-----G.....                                                                                                                                                                 | 1400 |
| KF743726  | P | .....CT.....G.....T.....C.....G.....CC.....T.....A.....A.TC.....C.....G-----G.....                                                                                                                                                                                     | 1400 |
| KF743711  | P | .....CT.....G.....T.....C.....G.....CC.....T.....A.....A.TC.....C.....G-----G.....                                                                                                                                                                                     | 1401 |
| KF743728  | P | .....CT.....G.....T.....C.....G.....CC.....T.....A.....A.TC.....C.....G-----G.....                                                                                                                                                                                     | 1401 |
| KF743721  | P | .....CT.....G.....T.....C.....G.....CC.....T.....A.....A.TC.....C.....G-----G.....                                                                                                                                                                                     | 1401 |
| KF743719  | P | .....CT.....G.....T.....C.....G.....CC.....T.....A.....A.TC.....C.....G-----G.....                                                                                                                                                                                     | 1410 |
| KF743718  | P | .....CT.....G.....T.....C.....G.....CC.....T.....A.....A.TC.....C.....G-----G.....                                                                                                                                                                                     | 1410 |
| KF743716  | P | .....CT.....G.....T.....C.....G.....CC.....T.....A.....A.TC.....C.....G-----G.....                                                                                                                                                                                     | 1410 |
| GU562823  | M | .....A.....TA.....TC.....T.....C.....G.....G.....GG.....GG.....C.....TA.....A.....A.T.G.....G.....AAATC.....CC.....                                                                                                                                                    | 1379 |
| HMU82963  | M | .....C.....TA.....G.....C.....C.....T.....G.....G.....GG.....GG.....T.....CA.....A.....C.....C.T.G.....A.....AATT.....CC.....                                                                                                                                          | 1388 |
| DQ157153  | M | .....G.....G.....C.....G.....G.....GG.....GG.....T.....CA.....A.....C.....C.T.G.....T.....A.....AA.....C.....C.....                                                                                                                                                    | 1368 |
| AY831867  | M | .....A.....TC.....T.....C.....G.....G.....GG.....GG.....T.....CA.....A.....C.....C.T.G.....T.....A.....AA.....C.....C.....                                                                                                                                             | 1384 |
| AY171918  | M | .....TA.....G.....C.....C.....T.....T.....C.....G.....G.....GG.....GG.....T.....CA.....A.....A.T.....T.....A.....AA.....ATC.....CC.....                                                                                                                                | 1391 |
| F0667774  | M | .....TTA.....TTC.....T.....G.....G.....GG.....GG.....GT.....TA.....AC.....A.....T.....G.....TA.....AA.....C.....C.....                                                                                                                                                 | 1347 |
| AB820288  | M | .....TA.....G.....TC.....T.....C.....G.....G.....GG.....GG.....T.....CA.....A.....C.....C.T.G.....A.....AATT.....CC.....                                                                                                                                               | 1373 |
| AB848714  | M | .....A.....T.....TTCC.....T.....GG.....CC.....C.....G.....G.....GG.....GG.....T.....CA.....A.....A.TC.....T.....G.....TA.....G.....AAC.....C.....                                                                                                                      | 1390 |
| AY529641  | M | .....A.....T.....TTCC.....T.....GG.....CC.....C.....G.....G.....GG.....GG.....T.....CA.....A.....A.TC.....T.....G.....TA.....G.....AAC.....C.....                                                                                                                      | 1385 |
| AF548631  | M | .....A.....T.....TTCC.....T.....GG.....CC.....C.....G.....G.....GG.....GG.....T.....CA.....A.....A.TC.....T.....G.....TA.....G.....AAC.....C.....                                                                                                                      | 1385 |
| KF743714  | P | .....A.....T.....TTCC.....T.....GG.....CC.....C.....G.....G.....GG.....GG.....T.....CA.....A.....A.TC.....T.....G.....TA.....G.....AAC.....C.....                                                                                                                      | 1390 |
| AB725596  | M | .....A.....T.....TTCC.....T.....GG.....CC.....C.....G.....G.....GG.....GG.....T.....CA.....A.....A.TC.....T.....G.....TA.....G.....AAC.....C.....                                                                                                                      | 1357 |
| KF743709  | P | .....A.....T.....TTCC.....T.....GG.....CC.....C.....G.....G.....GG.....GG.....T.....CA.....A.....A.TC.....T.....G.....TA.....G.....AAC.....C.....                                                                                                                      | 1390 |
| KF743723  | P | .....A.....T.....TTCC.....T.....GG.....CC.....C.....G.....G.....GG.....GG.....T.....CA.....A.....A.TC.....T.....G.....TA.....G.....AAC.....C.....                                                                                                                      | 1390 |
| KF743735  | P | .....A.....T.....TTCC.....T.....GG.....CC.....C.....G.....G.....GG.....GG.....T.....CA.....A.....A.TC.....T.....G.....TA.....G.....AAC.....C.....                                                                                                                      | 1390 |
| KF743732  | P | .....A.....T.....TTCC.....T.....GG.....CC.....C.....G.....G.....GG.....GG.....T.....CA.....A.....A.TC.....T.....G.....TA.....G.....AAC.....C.....                                                                                                                      | 1390 |
| KF743705  | P | .....A.....T.....TTCC.....T.....GG.....CC.....C.....G.....G.....GG.....GG.....T.....CA.....A.....A.TC.....T.....G.....TA.....G.....AAC.....C.....                                                                                                                      | 1390 |
| KF743712  | P | .....A.....T.....TTCC.....T.....GG.....CC.....C.....G.....G.....GG.....GG.....T.....CA.....A.....A.TC.....T.....G.....TA.....G.....AAC.....C.....                                                                                                                      | 1390 |
| KF743725  | P | .....A.....T.....TTCC.....T.....GG.....CC.....C.....G.....G.....GG.....GG.....T.....CA.....A.....A.TC.....T.....G.....TA.....G.....AAC.....C.....                                                                                                                      | 1390 |
| KF743708  | P | .....A.....T.....TTCC.....T.....GG.....CC.....C.....G.....G.....GG.....GG.....T.....CA.....A.....A.TC.....T.....G.....TA.....G.....AAC.....C.....                                                                                                                      | 1390 |
| KF743730  | P | .....A.....T.....TTCC.....T.....GG.....CC.....C.....G.....G.....GG.....GG.....T.....CA.....A.....A.TC.....T.....G.....TA.....G.....AAC.....C.....                                                                                                                      | 1390 |
| GU734681  | M | .....A.....T.....TTCC.....T.....GG.....CC.....C.....G.....G.....GG.....GG.....T.....CA.....A.....A.TC.....T.....G.....TA.....G.....AAC.....C.....                                                                                                                      | 1313 |
| KF743706  | P | .....TA.....T.....TTCC.....T.....G.....C.....C.....G.....G.....GG.....GG.....GT.....A.....ATAC.....T.....G.....TA.....A.....AAC.....C.....                                                                                                                             | 1391 |
| KF743734  | P | .....TA.....T.....TTCC.....T.....G.....C.....C.....G.....G.....GG.....GG.....GT.....A.....ATAC.....T.....G.....TA.....A.....AAC.....C.....                                                                                                                             | 1391 |
| KF743715  | P | .....TA.....T.....TTCC.....T.....G.....C.....C.....G.....G.....GG.....GG.....GT.....A.....ATAC.....T.....G.....TA.....A.....AAC.....C.....                                                                                                                             | 1391 |
| KF743736  | P | .....TA.....T.....TTCC.....T.....G.....C.....C.....G.....G.....GG.....GG.....GT.....A.....ATAC.....T.....G.....TA.....A.....AAC.....C.....                                                                                                                             | 1391 |
| KF743704  | P | .....TA.....T.....TTCC.....T.....G.....C.....C.....G.....G.....GG.....GG.....GT.....A.....ATAC.....T.....G.....TA.....A.....AAC.....C.....                                                                                                                             | 1391 |
| EP460765  | M | .....TA.....T.....TT.G.....T.....G.....TC.....C.....G.....G.....GG.....GG.....T.....A.....AT.....C.....T.....G.....A.....G.....AAC.....C.....G.....                                                                                                                    | 1392 |
| KF743710  | P | .....TA.....T.....TT.G.....T.....T.....T.....C.....G.....G.....GG.....GG.....T.....A.....ATAC.....T.....G.....TA.....A.....AAT.....C.....C.....                                                                                                                        | 1391 |
| KF743733  | P | .....TA.....T.....TT.G.....T.....T.....T.....C.....G.....G.....GG.....GG.....T.....A.....ATAC.....T.....G.....TA.....A.....AAT.....C.....C.....                                                                                                                        | 1391 |
| KF743707  | P | .....TA.....T.....TT.G.....T.....T.....T.....C.....G.....G.....GG.....GG.....T.....A.....ATAC.....T.....G.....TA.....A.....AAT.....C.....C.....                                                                                                                        | 1391 |
| KF743731  | P | .....TA.....T.....TT.G.....T.....T.....T.....C.....G.....G.....GG.....GG.....T.....A.....ATAC.....T.....G.....TA.....A.....AAT.....C.....C.....                                                                                                                        | 1391 |
| KF743720  | P | .....TA.....T.....TT.G.....T.....T.....T.....C.....G.....G.....GG.....GG.....T.....A.....ATAC.....T.....G.....TA.....A.....AAT.....C.....C.....                                                                                                                        | 1391 |
| NB_036946 | M | .....A.....C.....T.....AA.....GT.....T.....TG.....T.....C.....A.....TCA.....C.....G.....CGA.....CGCT.....C.....T.....G.....C.....GG.....CTG.....T.....A.....GCC.....GT.....G.....TAA.....GAACT.....C.....AGCA.....G.....C.....GG.....C.....G.....                      | 1433 |
| F2245866  | M | .....A.....C.....T.....AA.....A.....A.....T.....TG.....T.....C.....A.....TCA.....C.....T.....G.....CGA.....CGCT.....C.....T.....G.....C.....GG.....TTG.....T.....A.....GCC.....G.....G.....AGT.....A.....CTTCGGAGCGACT.....AGGCA.....G.....CCGA.....C.....G.....G..... | 1446 |
| AF125879  | M | .....AT.....ATCA.....GT.....A.....T.....TG.....T.....C.....A.....TCA.....C.....GC.....GT.....A.....TATC.....AA.....A.....CGCAA.....T.....A.....GC.....AA.....TGG.....A.....A.....CG.....CT.....GAT.....AT.....                                                         | 1410 |
| AF125878  | M | .....T.....ATCA.....G.....A.....T.....TG.....T.....C.....A.....TCA.....C.....GC.....GT.....A.....TATC.....AA.....A.....CGCAA.....T.....A.....GC.....AA.....TGG.....A.....A.....CG.....CT.....GAT.....AT.....                                                           | 1411 |
| DQ522159  | M | .....T.....ATCA.....G.....A.....T.....TG.....T.....C.....A.....TCA.....C.....GC.....GT.....A.....TATC.....AA.....A.....CGCAA.....T.....A.....GC.....AA.....TGG.....A.....A.....CG.....CT.....GAT.....AT.....                                                           | 1416 |



Table S3. Best fit GLM of hemoplasma infection prevalence in raccoons

| Variables                                     | Estimate | Standard error | Z value | Pr(> z ) |
|-----------------------------------------------|----------|----------------|---------|----------|
| Intercept                                     | -3.66    | 1.42           | -2.6    | 0.01*    |
| Body weight (kg)                              | 1.30     | 0.37           | 3.46    | 0.005*** |
| habitat (urban)                               | 2.01     | 2.08           | 0.967   | 0.33     |
| Body weight (kg)* habitat (urban) interaction | -1.08    | 0.48           | -2.25   | 0.025    |

Significance codes: 0 '\*\*\*', 0.001 '\*\*', 0.01 '\*', AICc=95.2
